# Supplementary material
Source: PubMed Central journal article supplement (PMC7956158)
Supplement: NIHMS1647079-supplement-Supplementary_Files.pdf [file NIHMS1647079-supplement-Supplementary_Files.pdf]

---

**Supplementary information**

---

**RNA timestamps identify the age of single molecules in RNA sequencing**

---

In the format provided by the authors and unedited



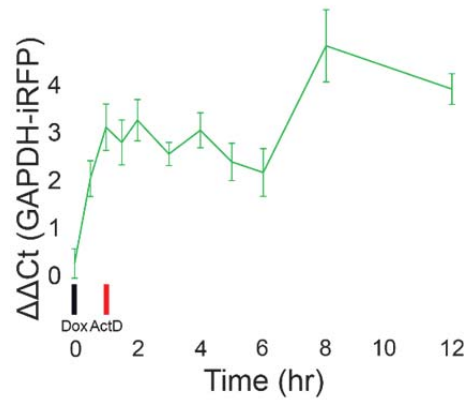

14  
15  
16  
17  
18

**Supplementary Figure 2:** The qPCR for the iRFP transcript, normalized to GAPDH, is shown as a function of time during the experiment in Fig. 1E. Values are normalized to the pre-doxycycline timepoint. Error bars show mean  $\pm$  std (N= 3 biological samples).

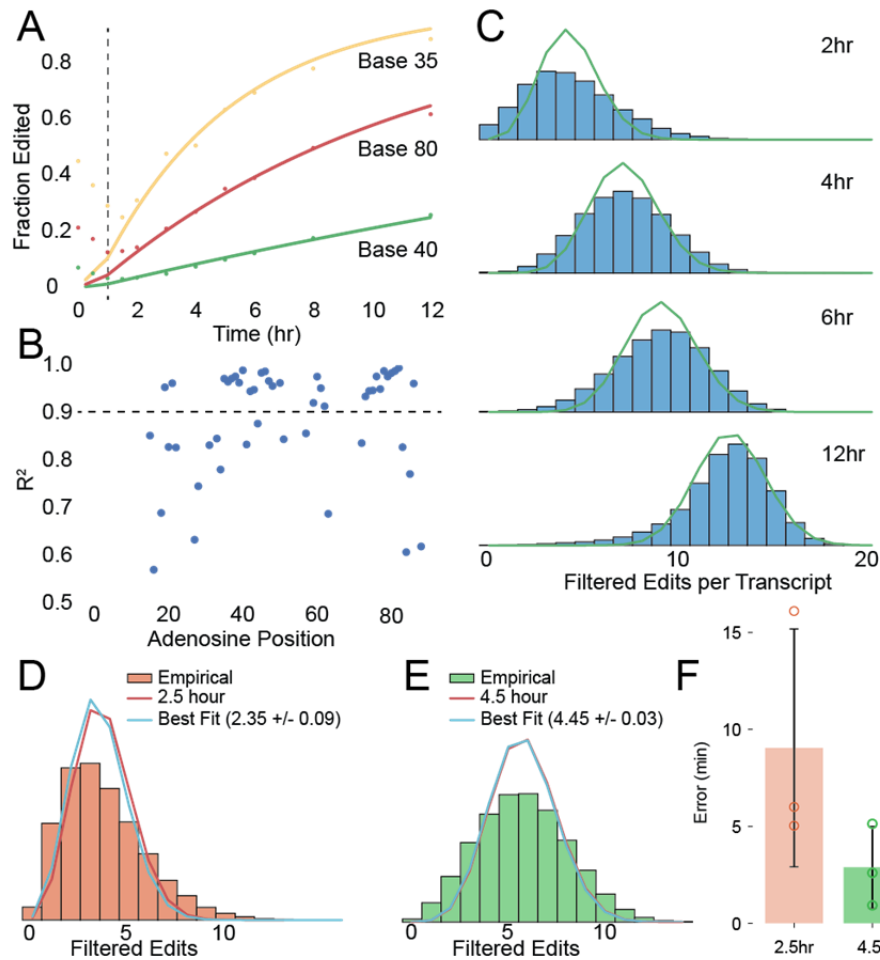

19

20 **Supplementary Figure 3.** We designed a statistical model to predict the RNA age distribution  
 21 as a function of time since doxycycline induction. If the adenosines on the timestamp  
 22 are edited independently and uniformly in time, then for each adenosine on the timestamp,  
 23 the fraction of RNAs with adenosines at that site should decrease exponentially with the time since  
 24 transcription, with a site-specific rate constant that depends on the local sequence context. (A)  
 25 For each adenosine on the timestamp, we fitted an exponential cumulative distribution function  
 26 (CDF) to the editing fraction over time at that base. The fraction of A to I edits as a function of  
 27 time is shown for three different bases on the timestamp, data from one replicate of 1E. Best  
 28 exponential fits are shown. The black dotted line indicates the addition of actinomycin D. (B)  
 29 We found 24 bases which fit well to the model (i.e., for which the value of  $R^2$  was greater than  
 30 0.9 across all replicates). For the same replicate as in (A), the  $R^2$  value of the exponential fit is  
 31 shown for each base on the transcript. The black dotted line indicates the  $R^2 > 0.9$  cutoff used for  
 32 the exponential model. (C) Analyzing only those bases, the distribution of edits per RNAs was  
 33 well-approximated by a Poisson binomial distribution with a single parameter,  $t$ , which  
 34 represents time since doxycycline was added to the medium (see Methods), with the weights in  
 35 the Poisson binomial distribution given by the exponential CDFs. The masked editing histograms  
 36 for four timepoints from the same replicate are shown (only the bases with  $R^2 > 0.9$  are  
 37 included). In green, the Poisson binomial distribution for each timepoint including all the bases  
 38 with  $R^2 > 0.9$  (see Methods). (D) We used this Poisson binomial distribution to infer the times of  
 39 cells induced at 2.5 and 4.5 hours prior to lysis, timepoints that had not been included in the

40 dataset used to fit the exponential CDFs. By minimizing the Kullback-Leibler divergence (which  
41 is equivalent to maximizing the likelihood) between the test distributions and the Poisson  
42 binomial distribution over  $t$ , we inferred that timing of those events to be  $2.35\text{hr} \pm 0.09\text{hr}$  and  
43  $4.45\text{hr} \pm 0.03\text{hr}$  (mean  $\pm$  s.d.,  $N=3$  biological samples), respectively. In orange, the masked ( $R^2 >$   
44  $0.9$  in all 3 replicates from 1E, see Methods) editing histogram for a single 2.5 hour replicate  
45 along with Poisson binomial distribution for 2.5 hours (red line), and the Poisson binomial  
46 distribution with least KL divergence from the empirical distribution (blue line). The time  
47 estimate is mean  $\pm$  s.d. ( $N=3$  biological samples). (E) As in (D), but for the 4.5 hour timepoint.  
48 (F) The mean absolute error is shown for the (D) and (E). Error bars show mean  $\pm$  S.D. ( $N = 3$   
49 biological samples).  
50

**A** Mean Reads per Conditions

|             |            |                  |            |           |
|-------------|------------|------------------|------------|-----------|
| Transfected | Tet Only   | 3.377e+04        | 103.7      | 3.78e+04  |
|             | Vivid Only | 60.67            | 1.098e+05  | 1.197e+05 |
|             | Both       | 2.944e+04        | 3.78e+04   | 7.112e+04 |
|             |            | Tet Only         | Vivid Only | Both      |
|             |            | Barcode Analyzed |            |           |

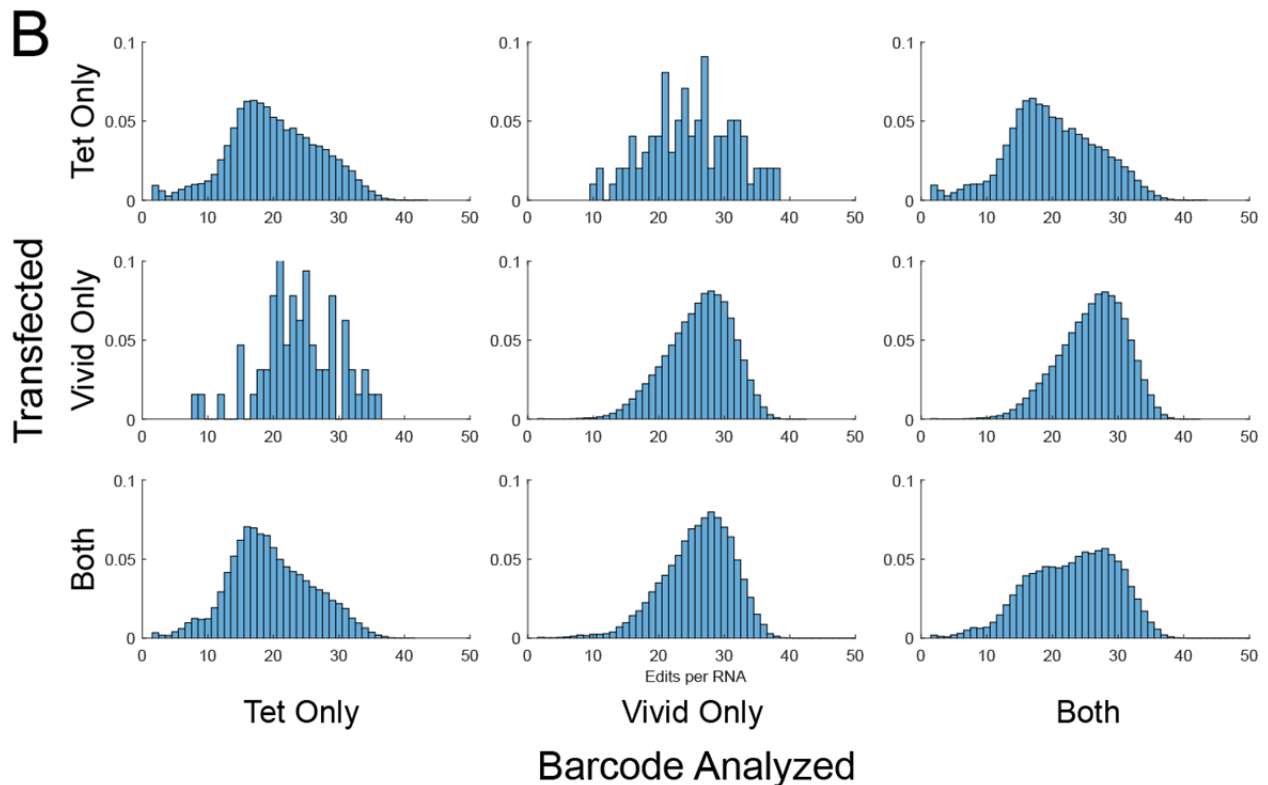

51  
52  
53  
54  
55  
56  
57

**Supplementary Figure 4.** The fact that timestamps work with multiple promoters raises the possibility of recording the activity of multiple promoters simultaneously in a single cell population, and we validated that this is possible using barcoded timestamps responsive to the Tet and Vivid promoters. All editing histograms are normalized to sum to 1. (A) For cells transfected with a barcoded TRE-responsive timestamp construct, a barcoded Vivid-responsive timestamp construct, or both, the number of reads for the TRE-responsive timestamp, Vivid-

58 responsive timestamp, or both are shown. When only one timestamp is transfected, only one  
59 barcode is detected in significant numbers, confirming that there is minimal crossover between  
60 timestamp barcodes. Note that the third column is not the sum of the first and second columns,  
61 because it includes barcodes that did not perfectly align to either the Tet or Vivid timestamp  
62 barcodes. **(B)** To further confirm the possibility of multiplexing using barcoded timestamps, we  
63 analyzed the editing histograms for cells that were transfected with a barcoded TRE-responsive  
64 timestamp construct, a barcoded Vivid-responsive timestamp construct, or both. The editing  
65 histograms for the Vivid-responsive and TRE-responsive timestamps do not seem to change  
66 when the other timestamp is also present, again suggesting that there is minimal cross-talk  
67 between barcoded timestamp constructs. All editing histograms are normalized to sum to 1.  
68

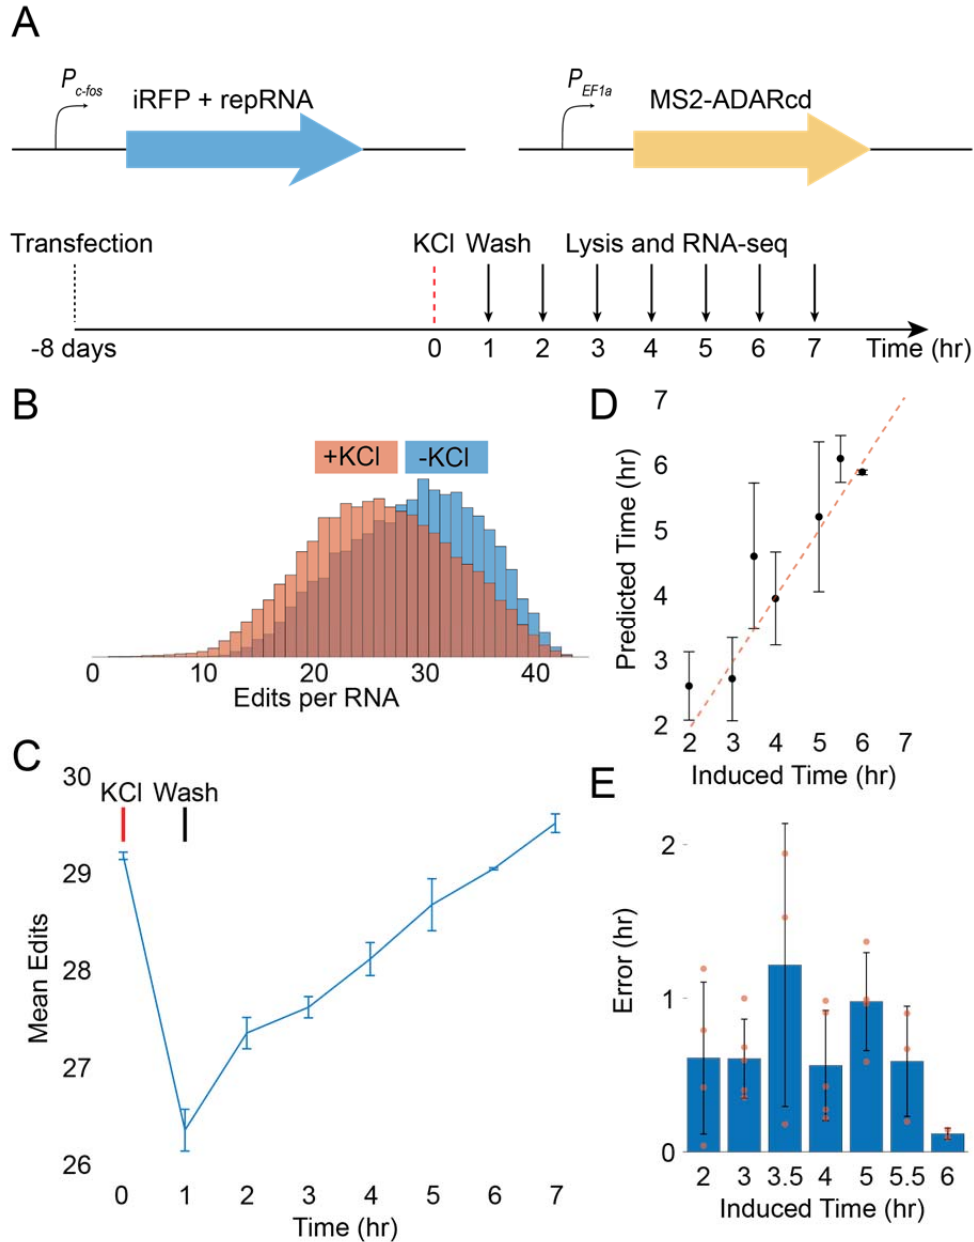

69

70 **Supp Fig. 5: Sequencing-Based Activity Measurement in Neurons using c-Fos Timestamps.**

71 (A) Schematic of timestamps constructs and experimental timeline for neuronal recording. (B)

72 Editing histograms are shown for neurons prior (blue) and one hour following (orange) KCl

73 induction. The lower overall editing rate for the +KCl case indicates the generation of new

74 repRNAs by the c-fos promoter. Editing histograms are normalized so the sum of all values is 1.

75 (C) The mean editing rate is shown as a function of time following KCl induction. (D) The

76 predicted and actual time estimates are shown for all timepoints. Dotted line is a guide for  $Y=X$ .

77 There are no estimates for the 1 hour and 7 hour timepoints due to mean interpolation. (E) The

78 mean absolute error in the predictions from (C) is shown as a function of time since induction.

79 All error bars (C-E) show mean  $\pm$  SD. (For C-E  $N$  = biological replicates as follows, 0hr  $N$  = 2,

80 1hr  $N$ =3, 2hr  $N$ =4, 3hr  $N$ =5, 3.5hr  $N$ =3, 4hr  $N$ =5, 5hr  $N$ = 4, 5.5hr  $N$  = 3, 6hr  $N$ =2, 7hr  $N$ =2).

81



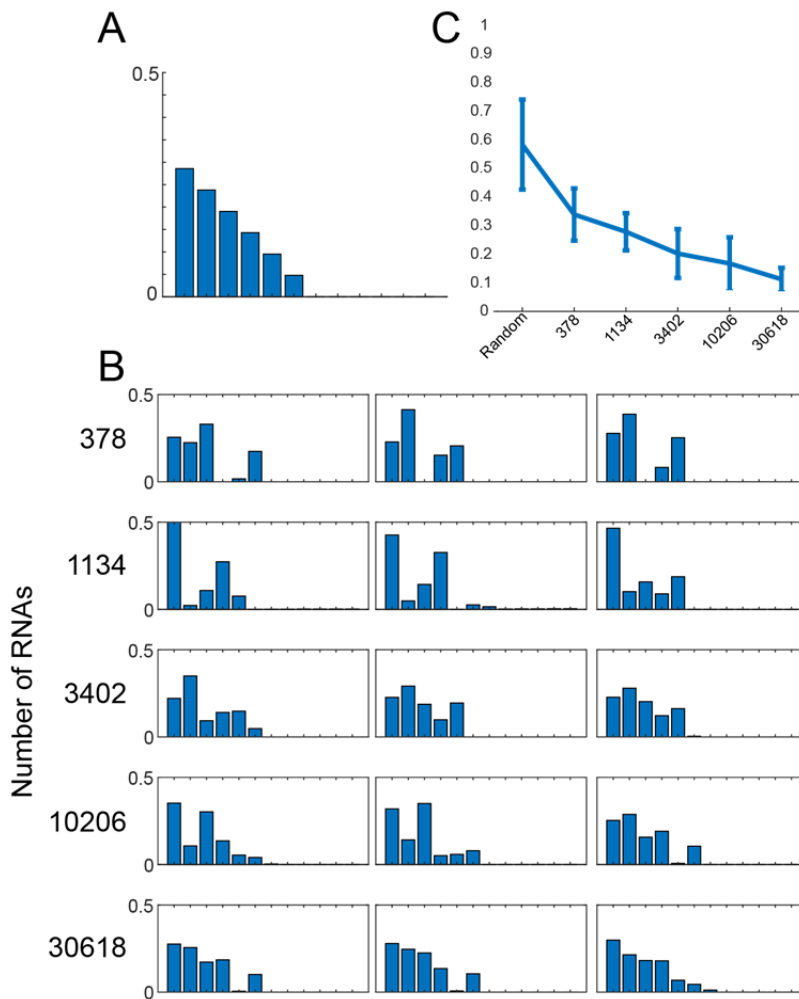

83

84 **Supplementary Fig. 6:** (A) The ramp profile used for simulations in B and C. (B) Distributions  
 85 produced by the gradient descent decoder applied to the ramp profile in (A) with different  
 86 numbers of RNAs (rows). Columns show technical replicates, each corresponding to a different  
 87 random set of RNAs. Replicates for display were selected at random. (C) The fraction of weight  
 88 incorrectly assigned. “Random” was calculated on distributions chosen from a Dirichlet  
 89 distribution. Error bars show mean  $\pm$  std ( $N = 10$  replicates).

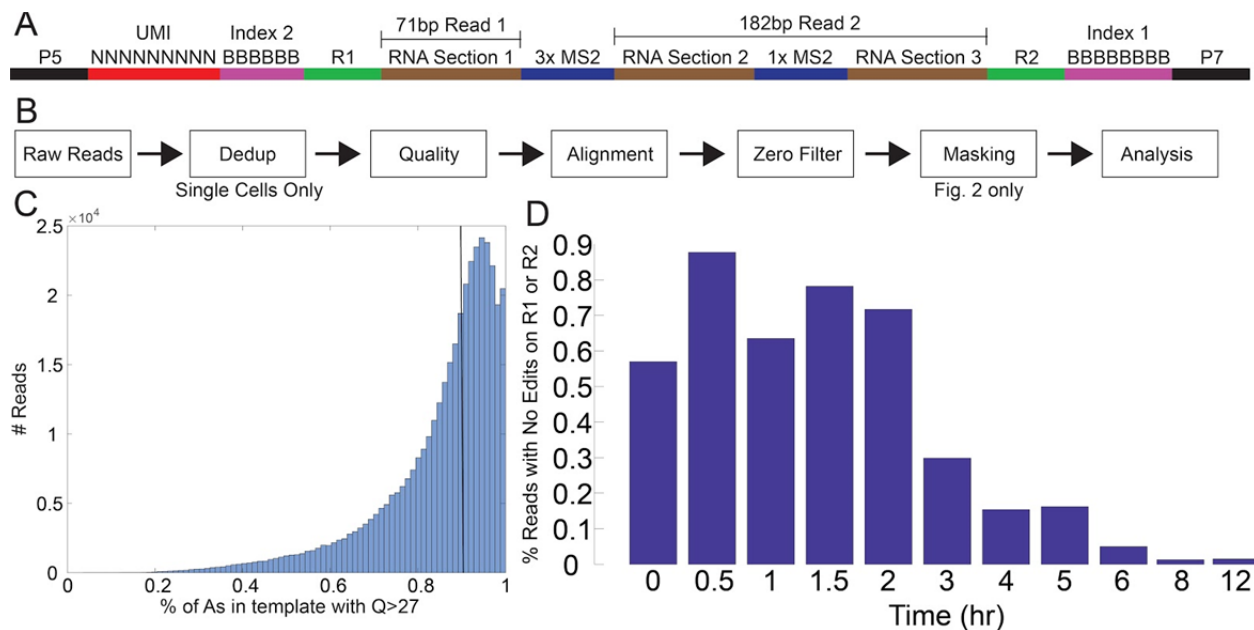

90  
 91 **Supplementary Fig. 7:** (A) The read structure of the timestamp is shown. (B) A schematic of  
 92 the analysis pipeline is shown. See Methods. (C) For one replicate from the experiment in Fig.  
 93 1E, a histogram of the number of reads with a given percentage of As with Q score >27 is shown.  
 94 This includes all sites that are As on the timestamp template, i.e., it also counts Gs that are read  
 95 at positions that are A on the template. The black line indicates the 90% cutoff, which was  
 96 applied to all analysis. (D) For one replicate from the experiment in Fig. 1E, the percentage of  
 97 reads having no edits in either R1 or R2 is shown as a function of time. These reads were  
 98 excluded from analysis, except where otherwise stated in Fig. S2.  
 99

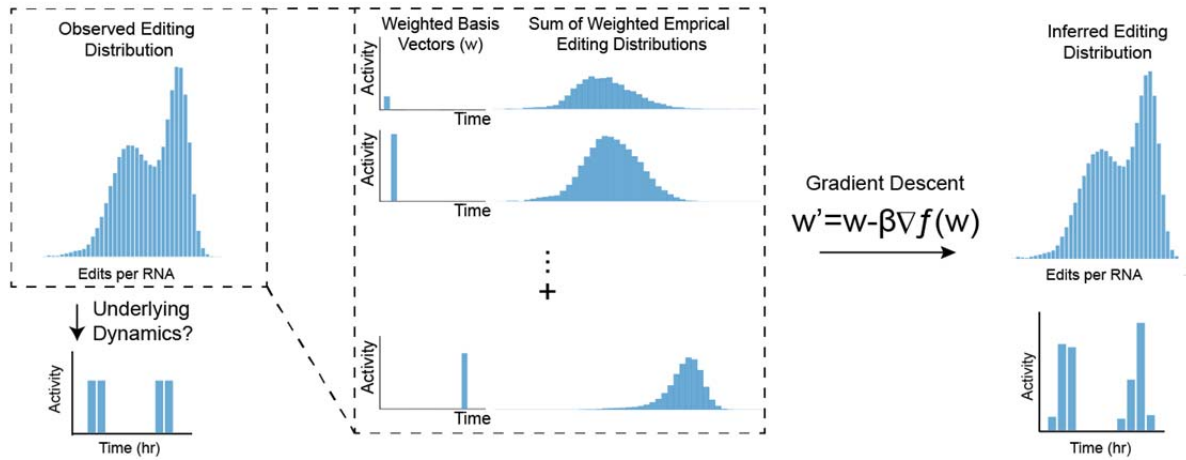

100  
 101 **Supplementary Fig. 8: Schematic for decoder of timestamps using gradient descent.** Given  
 102 an observed distribution of edits per RNA, we want to reconstruct the set of 1 hour weights  
 103 which generate this observed distribution. To infer the transcriptional program underlying this  
 104 observed editing distribution, we perform gradient descent to minimize the L2 norm between the  
 105 observed distribution and a convex (a nonnegative linear combination with weights summing to  
 106 1) combination of the 12 basis distributions. These basis distributions are obtained from the he  
 107 average distribution of edits obtained from a transcriptional pulse lasting one hour that began  
 108 between 1 and 12 hours in the past in the calibration experiment performed in HEK293 cells.

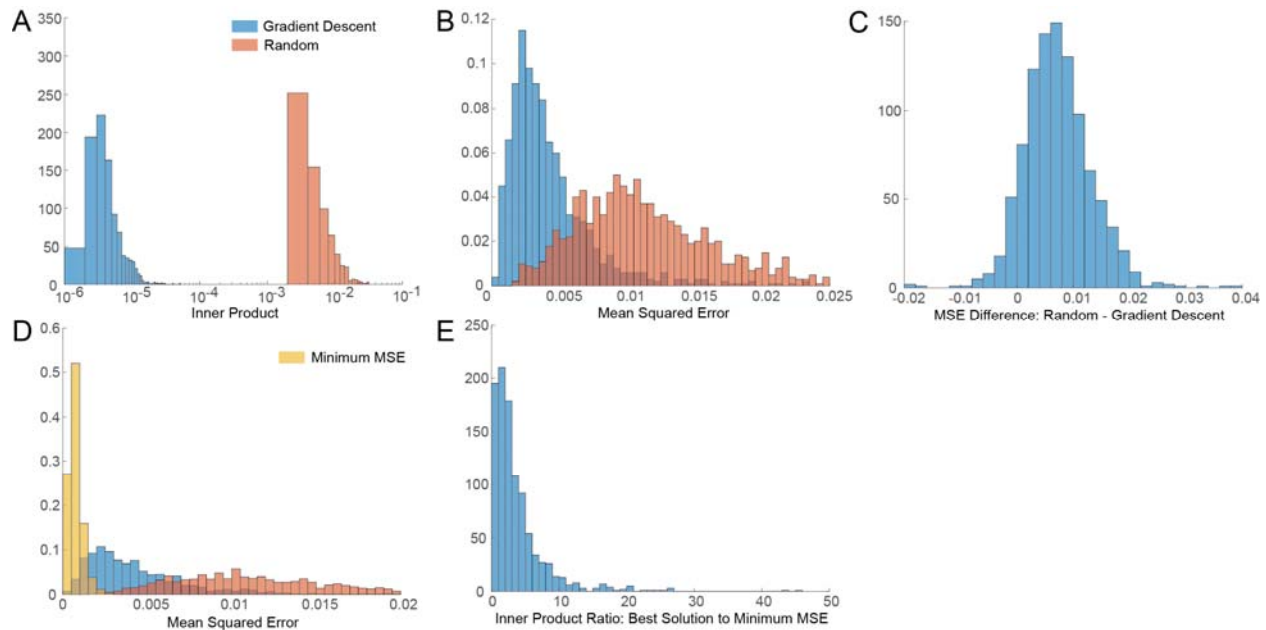

109  
 110 **Supplementary Figure 9:** For 1000 randomly generated weight vectors (“simulated vectors”),  
 111 chosen according to a Dirichlet distribution with uniform weights, we used gradient descent to  
 112 find the approximation (“approximated vectors”) that minimized the L2 norm (“inner product”)  
 113 between the RNA editing distribution corresponding to the simulated vectors (“simulated  
 114 distributions”) and the RNA editing distribution corresponding to the approximated vectors  
 115 (“approximated distributions”). We refer to the L2 norm between the distributions as the inner  
 116 product to distinguish it from the L2 norm between the vectors, which we refer to as the mean  
 117 squared error (MSE). **(A)** The inner product between simulated distributions and approximated  
 118 distributions is shown in blue. By contrast, the inner product between simulated distributions and  
 119 other random distributions is shown in orange. **(B)** The mean squared error between the  
 120 simulated vectors and approximated vectors is shown in blue. By contrast, the inner product  
 121 between the simulated distributions and other random distributions is shown in orange. Note that  
 122 a substantial number of random weight vectors have lower mean squared error than the  
 123 approximated vectors. This is possible because the noise in the basis distribution set used to  
 124 generate the approximated distributions from the approximated vectors is different from the  
 125 noise in the basis distribution set used to generate the simulated distributions from the simulated  
 126 vectors, so the minimum of inner product between the simulated and approximated distributions  
 127 is not always the same as the minimum of the MSE between the simulated and approximated  
 128 vectors. **(C)** Another visualization of (B). For each simulated vector, we calculated both an  
 129 approximated vector and a random vector. The difference in MSE between the approximated and  
 130 random vectors is shown. Negative values correspond to test vectors for which the associated  
 131 random vector was a better approximation to the simulated vector than the approximated vector.  
 132 **(D)** Blue and orange bars are the same as in (B). Yellow bars correspond to the minimum MSE  
 133 among all of the solutions found by gradient descent for a given test vector, indicating that the  
 134 inner product minima found by the gradient descent are not in general minima of the MSE. **(E)**  
 135 The difference in the inner product between the solutions with the minimum MSE found by  
 136 gradient descent, and the solutions with the minimum inner product, as a fraction of the  
 137 minimum inner product. The solutions with the minimum MSE discovered by gradient descent  
 138 often have inner products several fold higher than the solution with the minimum inner product.



140 **Supplementary Table 1:** List of plasmids used in this study. This list excludes pCMV Tet3G,  
 141 which is available commercially from Clontech.

142

| Num   | Name                              | Description                                                                                                                                                                                                                                       | Used in                         |
|-------|-----------------------------------|---------------------------------------------------------------------------------------------------------------------------------------------------------------------------------------------------------------------------------------------------|---------------------------------|
| 116v1 | pAAV-Ef1a-MCP-dmADARE488Q         | Fusion of MS2 coat protein to Drosophila ADAR E488Q, under Ef1a promoter, with WPRE                                                                                                                                                               | Supplementary Fig 1B,C          |
| 116v5 | pAAV-Ef1a-MCP-huADARE488QT490A    | As with 116v1, but Human ADAR2 E488QT490A                                                                                                                                                                                                         | All figures                     |
| 116v6 | pAAV-Ef1a-MCP-huADART490A         | As with 116v1, but Human ADAR2 T490A                                                                                                                                                                                                              | Supplementary Fig. 1B,C         |
| 133   | pcDNA3.1-GAVPO                    | GAVPO (VIVID transactivator) expressed under the CMV promoter in the pcDNA3.1 backbone.                                                                                                                                                           | Fig. 3C-G, Supplementary Fig. 4 |
| 147B1 | pTRE3G-iRFP-B1-timestamp_A        | Timestamp Template A inserted into the 3' UTR of iRFP between a bActin Zipcode element and a WPRE element, in the pTRE3G backbone, with RNA barcode TGC. Also includes a xrRNA element in the 5' UTR.                                             | All figures                     |
| 148B1 | pTRE3G-iRFP-B1-timestamp_B        | Same as 147B1, but with RNA Template B.                                                                                                                                                                                                           | Supplementary Fig. 1            |
| 149B3 | pLenti-5xUASG-iRFP-B3-timestamp-A | timestamp Template A inserted into the 3' UTR of iRFP between a bActin Zipcode element and a WPRE element, in a second generation lentiviral backbone with the Vivid promoter, with RNA barcode CTG. Also includes a xrRNA element in the 5' UTR. | Fig. 3C-G, Supplementary Fig. 4 |
| 187   | pTRE3G-c-fos-iRFP-B3-repRNA-A     | Same as 147B1, with the TRE promoter removed and replaced with a c-Fos promoter from pAAV-cFos-EYFP (Addgene 47907), and with RNA barcode CTG.                                                                                                    | Supplementary Fig. 5            |

143

144

**Supplementary Table 2:** List of oligos used in this study

| Name        | Description                            | Sequence                                                                                       |
|-------------|----------------------------------------|------------------------------------------------------------------------------------------------|
| SGR-174B-1  | Barcoded RT Primer with 3bp barcode    | AATGATACGGCGACCACCGAGATCTACACNNNNNNNNNNNNNNN<br>CCT GCG AGG CCC GCATCTTTCACAAATTTTGTAATCCAGAGG |
| SGR-174B-2  | ""                                     | AATGATACGGCGACCACCGAGATCTACACNNNNNNNNNNNNNNN<br>GAG GCG AGG CCC GCATCTTTCACAAATTTTGTAATCCAGAGG |
| SGR-174B-3  | ""                                     | AATGATACGGCGACCACCGAGATCTACACNNNNNNNNNNNNNNN<br>TTA GCG AGG CCC GCATCTTTCACAAATTTTGTAATCCAGAGG |
| SGR-174B-4  | ""                                     | AATGATACGGCGACCACCGAGATCTACACNNNNNNNNNNNNNNN<br>AGC GCG AGG CCC GCATCTTTCACAAATTTTGTAATCCAGAGG |
| SGR-174B-5  | ""                                     | AATGATACGGCGACCACCGAGATCTACACNNNNNNNNNNNNNNN<br>AAT GCG AGG CCC GCATCTTTCACAAATTTTGTAATCCAGAGG |
| SGR-174B-6  | ""                                     | AATGATACGGCGACCACCGAGATCTACACNNNNNNNNNNNNNNN<br>CAA GCG AGG CCC GCATCTTTCACAAATTTTGTAATCCAGAGG |
| SGR-174B-7  | Barcoded RT primer with 6 base barcode | AATGATACGGCGACCACCGAGATCTACACNNNNNNNNNNAGTGT<br>CGCG AGG CCC GCATCTTTCACAAATTTTGTAATCCAGAGG    |
| SGR-174B-8  | ""                                     | AATGATACGGCGACCACCGAGATCTACACNNNNNNNNNNATATCC<br>GGCG AGG CCC GCATCTTTCACAAATTTTGTAATCCAGAGG   |
| SGR-174B-9  | ""                                     | AATGATACGGCGACCACCGAGATCTACACNNNNNNNNNNCATT<br>GGCG AGG CCC GCATCTTTCACAAATTTTGTAATCCAGAGG     |
| SGR-174B-10 | ""                                     | AATGATACGGCGACCACCGAGATCTACACNNNNNNNNNNATGCT<br>AGCG AGG CCC GCATCTTTCACAAATTTTGTAATCCAGAGG    |
| SGR-174B-11 | ""                                     | AATGATACGGCGACCACCGAGATCTACACNNNNNNNNNNCCGTG<br>GGCG AGG CCC GCATCTTTCACAAATTTTGTAATCCAGAGG    |
| SGR-174B-12 | ""                                     | AATGATACGGCGACCACCGAGATCTACACNNNNNNNNNNATGAG<br>TGCG AGG CCC GCATCTTTCACAAATTTTGTAATCCAGAGG    |
| SGR-174B-13 | ""                                     | AATGATACGGCGACCACCGAGATCTACACNNNNNNNNNNCGAGC<br>AGCG AGG CCC GCATCTTTCACAAATTTTGTAATCCAGAGG    |
| SGR-174B-14 | ""                                     | AATGATACGGCGACCACCGAGATCTACACNNNNNNNNNNCGCGG<br>CGCG AGG CCC GCATCTTTCACAAATTTTGTAATCCAGAGG    |
| SGR-174B-15 | ""                                     | AATGATACGGCGACCACCGAGATCTACACNNNNNNNNNNACTTA<br>TGCG AGG CCC GCATCTTTCACAAATTTTGTAATCCAGAGG    |
| SGR-174B-16 | ""                                     | AATGATACGGCGACCACCGAGATCTACACNNNNNNNNNNATGAT<br>GGCG AGG CCC GCATCTTTCACAAATTTTGTAATCCAGAGG    |
| SGR-174B-17 | ""                                     | AATGATACGGCGACCACCGAGATCTACACNNNNNNNNNNAGTAG<br>GGCG AGG CCC GCATCTTTCACAAATTTTGTAATCCAGAGG    |
| SGR-174B-18 | ""                                     | AATGATACGGCGACCACCGAGATCTACACNNNNNNNNNNGTGA<br>CGCG AGG CCC GCATCTTTCACAAATTTTGTAATCCAGAGG     |
| SGR-174B-19 | ""                                     | AATGATACGGCGACCACCGAGATCTACACNNNNNNNNNNATCA<br>CGCG AGG CCC GCATCTTTCACAAATTTTGTAATCCAGAGG     |

|             |                     |                                                                                             |
|-------------|---------------------|---------------------------------------------------------------------------------------------|
| SGR-174B-20 | ""                  | AATGATACGGCGACCACCGAGATCTACACNNNNNNNNNCCCTA<br>GGCG AGG CCC GCATCTTTCACAAATTTTGTAAATCCAGAGG |
| SGR-174B-21 | ""                  | AATGATACGGCGACCACCGAGATCTACACNNNNNNNNNGCCCG<br>TGCG AGG CCC GCATCTTTCACAAATTTTGTAAATCCAGAGG |
| SGR-174B-22 | ""                  | AATGATACGGCGACCACCGAGATCTACACNNNNNNNNNTTCCC<br>GGCG AGG CCC GCATCTTTCACAAATTTTGTAAATCCAGAGG |
| SGR-174B-23 | ""                  | AATGATACGGCGACCACCGAGATCTACACNNNNNNNNNCATAT<br>AGCG AGG CCC GCATCTTTCACAAATTTTGTAAATCCAGAGG |
| SGR-174B-24 | ""                  | AATGATACGGCGACCACCGAGATCTACACNNNNNNNNNAACGC<br>CGCG AGG CCC GCATCTTTCACAAATTTTGTAAATCCAGAGG |
| SGR-174B-25 | ""                  | AATGATACGGCGACCACCGAGATCTACACNNNNNNNNNAGGTT<br>GGCG AGG CCC GCATCTTTCACAAATTTTGTAAATCCAGAGG |
| SGR-174B-26 | ""                  | AATGATACGGCGACCACCGAGATCTACACNNNNNNNNNTCAAT<br>AGCG AGG CCC GCATCTTTCACAAATTTTGTAAATCCAGAGG |
| SGR-175     | Custom Read 1       | GCG AGG CCC GCA TCT TTC ACA AAT TTT GTA ATC CAG AGG                                         |
| SGR-175-RC  | Custom Index 2      | CCTCTGGATTACAAAATTTGTGAAAGATGCGGGCCTCGC                                                     |
| SGR-176     | Barcoded PCR primer | CAAGCAGAAGACGGCATAACGAGAT ACTGGTCA AAG TTA CTA<br>TCG AAATGCCCTGAGTCCACCCCGG                |
| SGR-176-2   | ""                  | CAAGCAGAAGACGGCATAACGAGAT GTGTTCGT AAG TTA CTA<br>TCG AAATGCCCTGAGTCCACCCCGG                |
| SGR-176-3   | ""                  | CAAGCAGAAGACGGCATAACGAGAT TAACTGTT AAG TTA CTA<br>TCG AAATGCCCTGAGTCCACCCCGG                |
| SGR-176-4   | ""                  | CAAGCAGAAGACGGCATAACGAGAT GATTGGTG AAG TTA CTA<br>TCG AAATGCCCTGAGTCCACCCCGG                |
| SGR-176-5   | ""                  | CAAGCAGAAGACGGCATAACGAGAT GGAGAGAG AAG TTA CTA<br>TCG AAATGCCCTGAGTCCACCCCGG                |
| SGR-176-6   | ""                  | CAAGCAGAAGACGGCATAACGAGAT TGAGCGAT AAG TTA CTA<br>TCG AAATGCCCTGAGTCCACCCCGG                |
| SGR-176-7   | ""                  | CAAGCAGAAGACGGCATAACGAGAT CCTCCGTT AAG TTA CTA<br>TCG AAATGCCCTGAGTCCACCCCGG                |
| SGR-176-8   | ""                  | CAAGCAGAAGACGGCATAACGAGAT AACATATT AAG TTA CTA<br>TCG AAATGCCCTGAGTCCACCCCGG                |
| SGR-176-9   | ""                  | CAAGCAGAAGACGGCATAACGAGAT CTTACGTA AAG TTA CTA<br>TCG AAATGCCCTGAGTCCACCCCGG                |
| SGR-176-10  | ""                  | CAAGCAGAAGACGGCATAACGAGAT TGACGTAG AAG TTA CTA<br>TCG AAATGCCCTGAGTCCACCCCGG                |
| SGR-176-11  | ""                  | CAAGCAGAAGACGGCATAACGAGAT CTATGTAT AAG TTA CTA<br>TCG AAATGCCCTGAGTCCACCCCGG                |
| SGR-176-12  | ""                  | CAAGCAGAAGACGGCATAACGAGAT TTTGCAGA AAG TTA CTA<br>TCG AAATGCCCTGAGTCCACCCCGG                |



|            |                |                                                                              |
|------------|----------------|------------------------------------------------------------------------------|
| SGR-176-13 | ""             | CAAGCAGAAGACGGCATAACGAGAT GGTAGCGA AAG TTA CTA<br>TCG AAATGCCCTGAGTCCACCCCGG |
| SGR-176-14 | ""             | CAAGCAGAAGACGGCATAACGAGAT ACGGGTTT AAG TTA CTA<br>TCG AAATGCCCTGAGTCCACCCCGG |
| SGR-176-15 | ""             | CAAGCAGAAGACGGCATAACGAGAT TAAACCTC AAG TTA CTA<br>TCG AAATGCCCTGAGTCCACCCCGG |
| SGR-176-16 | ""             | CAAGCAGAAGACGGCATAACGAGAT GAGAACTG AAG TTA CTA<br>TCG AAATGCCCTGAGTCCACCCCGG |
| SGR-176-15 | ""             | CAAGCAGAAGACGGCATAACGAGAT GGTTTGAT AAG TTA CTA<br>TCG AAATGCCCTGAGTCCACCCCGG |
| SGR-176-18 | ""             | CAAGCAGAAGACGGCATAACGAGAT TAGATTAT AAG TTA CTA<br>TCG AAATGCCCTGAGTCCACCCCGG |
| SGR-176-19 | ""             | CAAGCAGAAGACGGCATAACGAGAT AAGGTTAG AAG TTA CTA<br>TCG AAATGCCCTGAGTCCACCCCGG |
| SGR-176-20 | ""             | CAAGCAGAAGACGGCATAACGAGAT CCGAAAAT AAG TTA CTA<br>TCG AAATGCCCTGAGTCCACCCCGG |
| SGR-177    | Custom Read 2  | AAG TTA CTA TCG AAA TGC CCT GAG TCC ACC CCG G                                |
| SGR-177-RC | Custom Index 1 | CCGGGGTGGACTCAGGGCATTTCGATAGTAACTT                                           |

147

148

149 **Supplementary Table 3:** List of RNA editing templates used in this study.

150

151 The following sequences are the sequences that were analyzed for RNA editing. Notes are supplied as a  
 152 courtesy to follow-on studies, and no representations are made as to their accuracy or reproducibility.

|                | Sequence                                                                                                                                                                                                                                                                                                                          | Notes                                                                                                                                                                                                                                  |
|----------------|-----------------------------------------------------------------------------------------------------------------------------------------------------------------------------------------------------------------------------------------------------------------------------------------------------------------------------------|----------------------------------------------------------------------------------------------------------------------------------------------------------------------------------------------------------------------------------------|
| <b>A_Short</b> | AGTACGCGTTAGATTAGATTAGATTAGATTA<br>GATTAGATTAGAAAAATTAATACGTACACC<br>ATCAGGGTACGTCTCAGACACCATCAGGGT<br>CTGTCTGGTACAGCATCAGCGTACCATATAT<br>TTTTTCCAATCCAATCCAATCCAATCCAATC<br>CAATCCAAATAGATCCTAATCA                                                                                                                               |                                                                                                                                                                                                                                        |
| <b>A</b>       | TTAGATTAGATTAGATTAGATTAGATTAGAT<br>TAGAAAAATTAATATACGTACACCATCAGG<br>GTACGTCATATATTTTTTCCAATCCAATCCA<br>ATCCAATCCAATCCAATCCAATACGCGTTAG<br>ATTAGATTAGATTAGATTAGATTAGATTAGA<br>AAAATTAATACGTACACCATCAGGGTACGT<br>CTCAGACACCATCAGGGTCTGTCTGGTACAG<br>CATCAGCGTACCATATATTTTTTCCAATCCA<br>ATCCAATCCAATCCAATCCAATCCAATAGA<br>TCCTAATCA |                                                                                                                                                                                                                                        |
| <b>B_Short</b> | AGTACGCGTTAGATTAGATTAGATTAGATTA<br>GATTAGATTAGAAAAATTAATACGTACACC<br>ATCAGGGTACGTCTCAGACACCATCAGGGT<br>CTGTCTGGTACAGCATCAGCGTACCATATAT<br>TTTTTCTAATCTAATCTAATCTAATCTAATCT<br>AATCTAAATAGATCCTAATCA                                                                                                                               |                                                                                                                                                                                                                                        |
| <b>B</b>       | TTAGATTAGATTAGATTAGATTAGATTAGAT<br>TAGAAAAATTAATATACGTACACCATCAGG<br>GTACGTCATATATTTTTTCTAATCTAATCTAA<br>TCTAATCTAATCTAATCTAAACGCGTTAGAT<br>TAGATTAGATTAGATTAGATTAGATTAGAAA<br>AATTAATACGTACACCATCAGGGTACGTCTC<br>AGACACCATCAGGGTCTGTCTGGTACAGCAT<br>CAGCGTACCATATATTTTTTCTAATCTAATCT<br>AATCTAATCTAATCTAATCTAAATAGATCCT<br>AATCA |                                                                                                                                                                                                                                        |
| <b>C</b>       | AGTACGCGTTAAATTATATTAATACTAAATTAT<br>AGATTAACAAGAATATTAATAACGTACACC<br>ATCAGGGTACGTCTCAGACACCATCAGGGT<br>CTGTCTGGTACAGCATCAGCGTACCTATTTA<br>ATATTCTTGTTAATCTATAATTTAGTTAATAT<br>AATTTAAATAGATCCTAATCA                                                                                                                             | This template shows significant background editing by endogenous ADAR enzymes, even in the absence of trans-expression of ADAR. It also showed extremely rapid editing on a timescale of single minutes in the presence of blue light, |

|          |                                                                                                                                                                                                    |                                                                                                                                                                                                              |
|----------|----------------------------------------------------------------------------------------------------------------------------------------------------------------------------------------------------|--------------------------------------------------------------------------------------------------------------------------------------------------------------------------------------------------------------|
|          |                                                                                                                                                                                                    | when MCP-Cry2 and CIBN-dmADARE488Q were co-expressed.                                                                                                                                                        |
| <b>D</b> | AGTACGCGATTGGTTAATCCCATTGGTTAAT<br>CCCATTGGTTAATCCCTTAATACGTACACCA<br>TCAGGGTACGTCTCAGACACCATCAGGGTCT<br>GTCTGGTACAGCATCAGCGTACCATATATGG<br>GTAAACTGATGGGTAAACTGATGGGTAA<br>ACTGATATAGATCCTAATCA   | Editing on this template showed significant sensitivity to the identity of the N-terminal fusion. MCP-ADAR was able to edit this template, whereas other ADAR enzymes, like a CIBN-ADAR fusion, were unable. |
| <b>E</b> | AGTACGCGAAAAAAAAAAAAAAAAAAAAA<br>AAAAAAAAAAAAAAAAAAAAAAAAACGTAC<br>ACCATCAGGGTACGTCTCAGACACCATCAG<br>GGTCTGTCTGGTACAGCATCAGCGTACCTTT<br>TTTTTTTTTTTTTTTTTTTTTTTTTTTTTTTT<br>TTTTTTTTATAGATCCTAATCA | This template was always severely underrepresented in sequencing, either due to difficulties with expression, amplification, or alignment.                                                                   |
